# Supplementary material for: Molecular detection and genetic characteristics of Babesia gibsoni in dogs in Shaanxi Province, China
Source: PubMed Central journal article supplement (PMC7376908; doi:10.1186/s13071-020-04232-w), 2020-07-22
Supplement: 13071_2020_4232_MOESM1_ESM.pdf [file 13071_2020_4232_MOESM1_ESM.pdf]

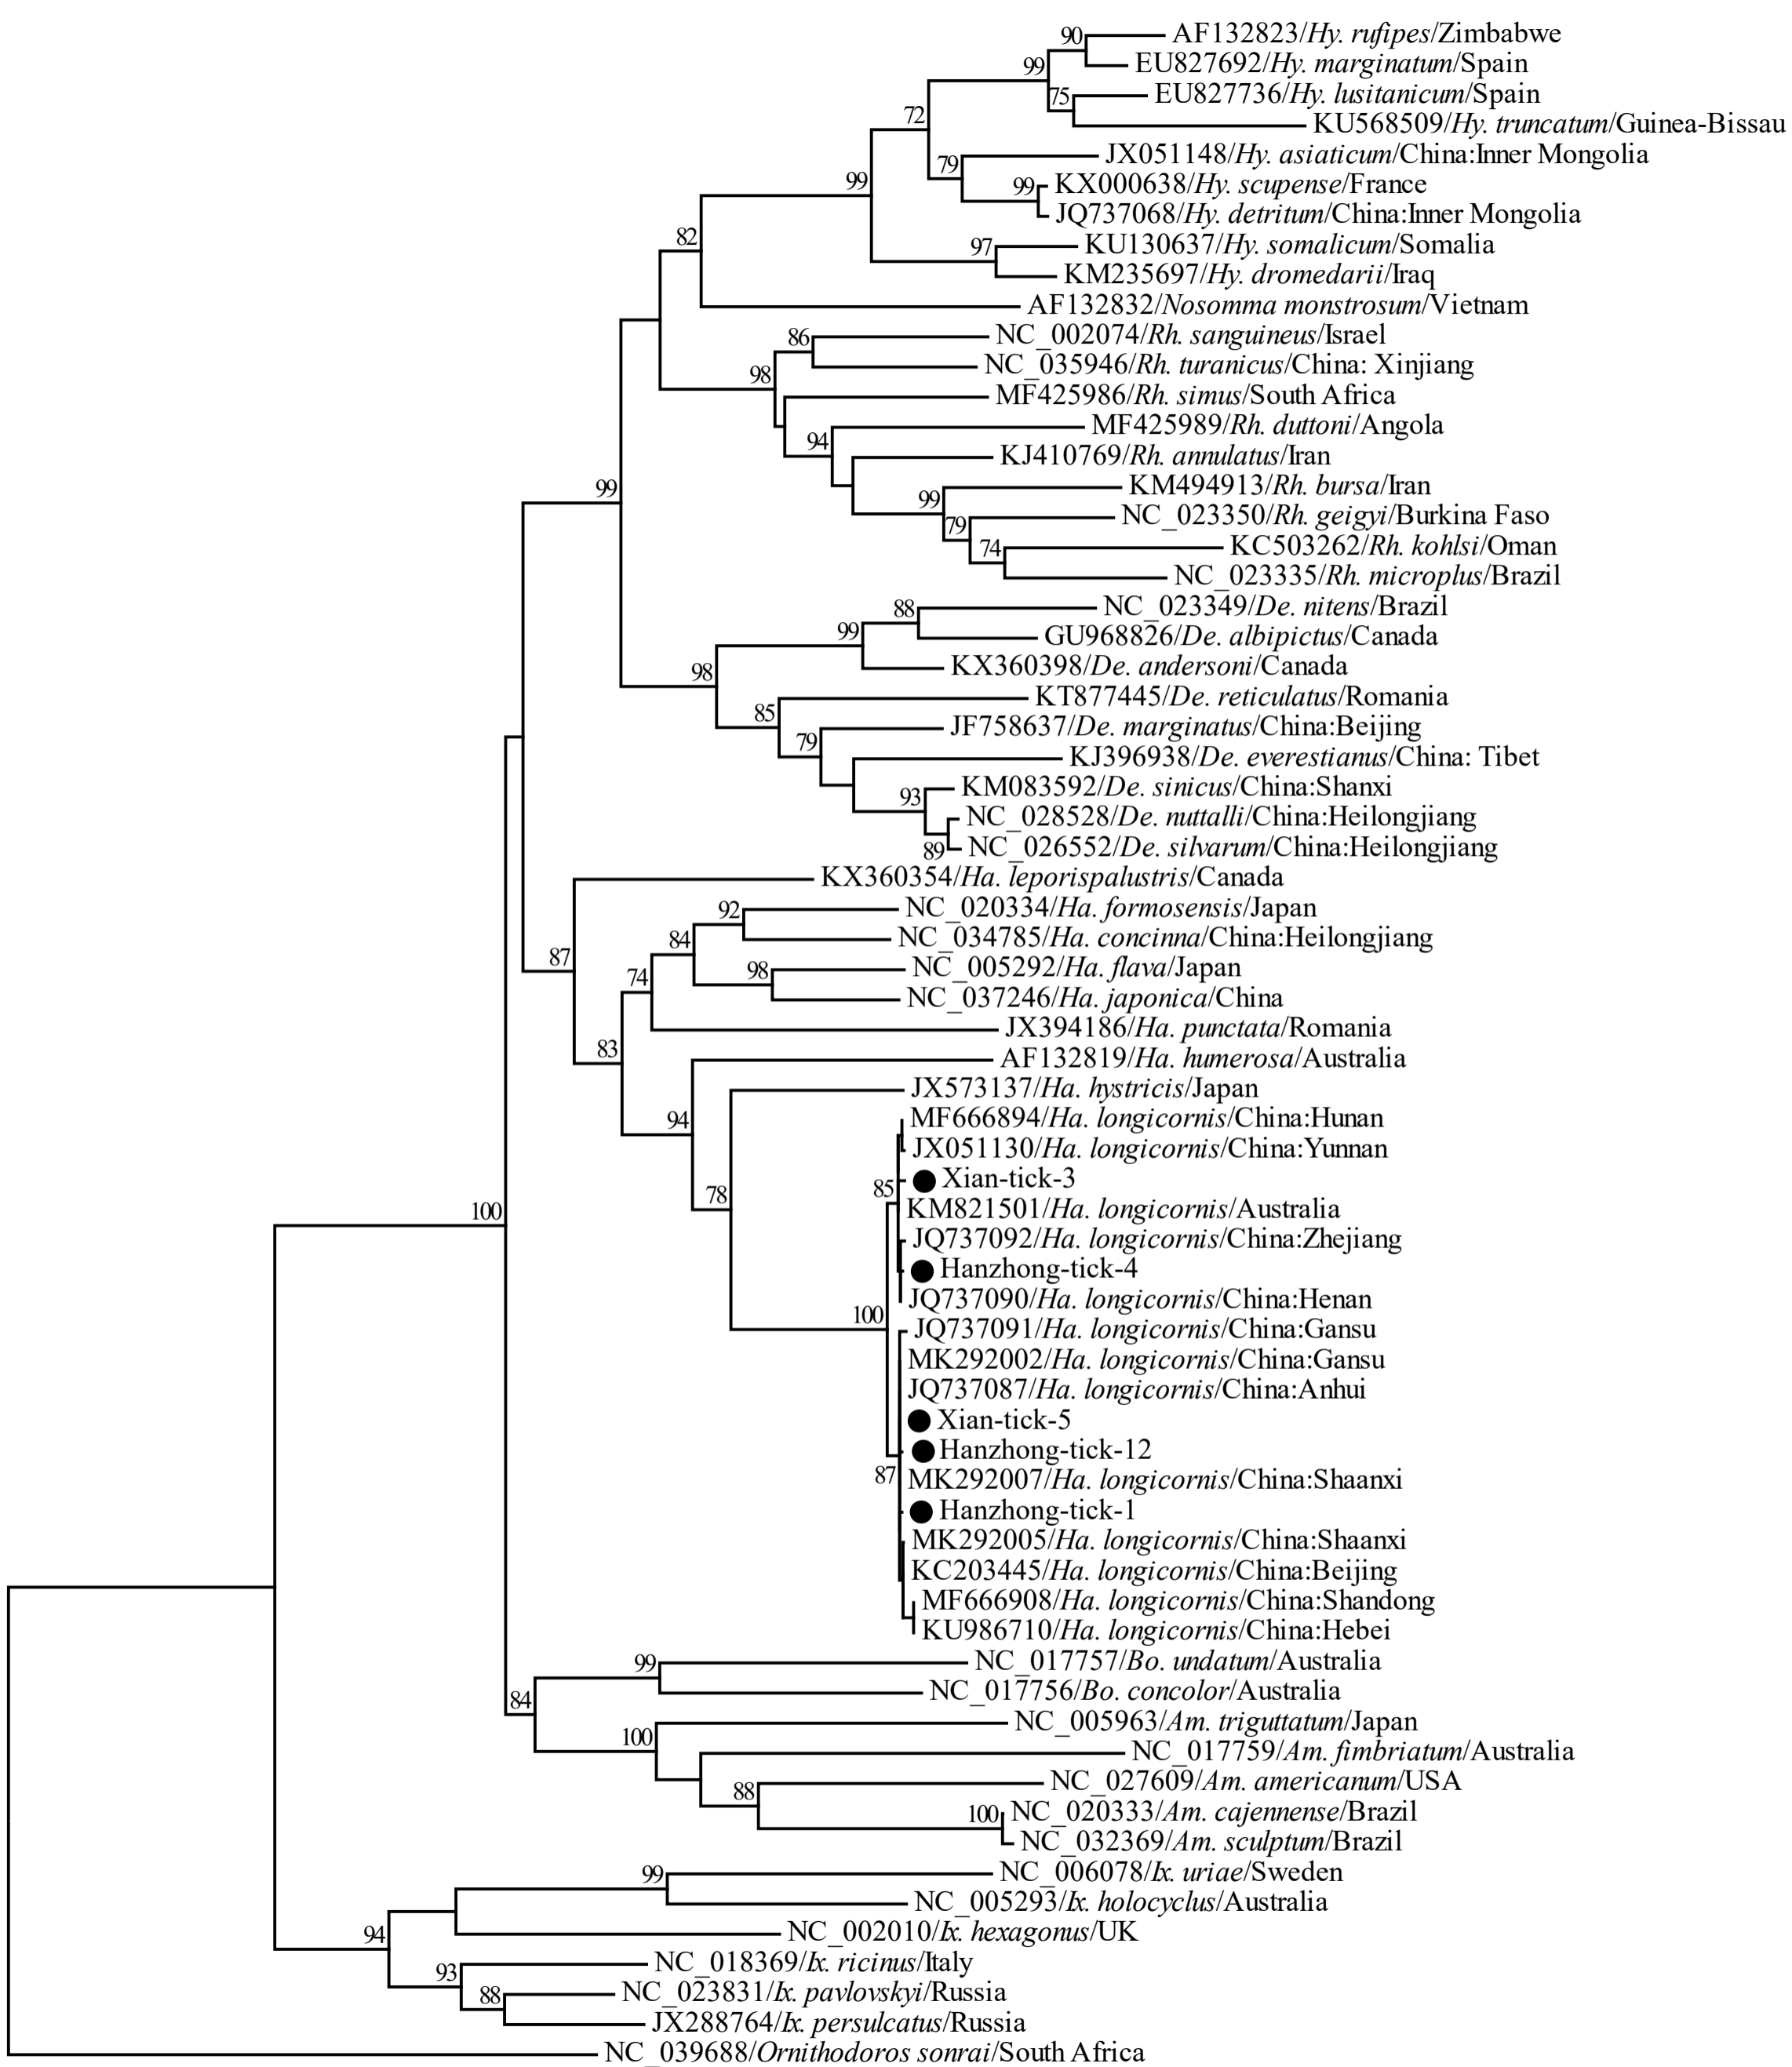

0.1
